# Supplementary material for: Exploration of antimony(iii) oxyhalides via single-site substitution in quest of large birefringence
Source: Royal Society of Chemistry journal article supplement (doi:10.1039/d4qi00564c), 2024-01-01
Supplement: d4qi00564c1.pdf [file d4qi00564c1.pdf]

## **Exploration of Antimony(III) Oxyhalides via Single-site Substitution in Quest of Large Birefringence**

Chenhui Hu,<sup>a,b,#</sup> Dongdong Chu,<sup>a,b,#</sup> Xueling Hou,<sup>a,b</sup> Feng Zhang,<sup>a,b,\*</sup> and Jian Han<sup>a,b,\*</sup>

<sup>a</sup> Research Center for Crystal Materials; State Key Laboratory of Functional Materials and Devices for Special Environmental Conditions; Xinjiang Key Laboratory of Functional Crystal Materials; Xinjiang Technical Institute of Physics and Chemistry, CAS, 40-1 South Beijing Road, Urumqi 830011, China.

<sup>b</sup> Center of Materials Science and Optoelectronics Engineering, University of Chinese Academy of Sciences, Beijing 100049, China.

\* Corresponding authors: zhangfeng@ms.xjb.ac.cn and hanjian@ms.xjb.ac.cn.

# These authors contributed equally to this work.

## Experimental Section

### Single-crystal preparation and the polycrystalline samples of the compounds.

Single crystals of SbOCl and Sb<sub>2</sub>OCl<sub>4</sub> were obtained via different methods. The compound SbOCl was found from experiments using autoclaves equipped with 23 mL Teflon liners heated to 220 °C at a rate of 10 °C h<sup>-1</sup>. The chemical reagents were dissolved in the deionized water (2 mL) with the following stoichiometry: SbCl<sub>3</sub>:H<sub>3</sub>BO<sub>3</sub>=1:3 for SbOCl. The chemical reagents SbCl<sub>3</sub> were dissolved in the deionized water (50 mL), these solutions were heated to 66 °C for Sb<sub>2</sub>OCl<sub>4</sub> and kept for evaporation to dryness at room temperature. Transparent single crystals with high quality could be manually separated from reaction products to further determine microscopic single-crystal structures. The quality of data for the Cl analog was superior to that of the Br-containing compound.

The solid-state reaction method was employed to synthesize the polycrystalline samples of SbOCl, Sb<sub>2</sub>OCl<sub>4</sub>, Sb<sub>3</sub>O<sub>4</sub>I, Sb<sub>8</sub>O<sub>11</sub>Cl<sub>2</sub>, and Sb<sub>8</sub>O<sub>11</sub>Br<sub>2</sub>. A mixture of Sb<sub>2</sub>O<sub>3</sub> and SbCl<sub>3</sub>/SbBr<sub>3</sub>/SbI<sub>3</sub> with the stoichiometric ratio was mixed and sealed under 10<sup>-3</sup> Pa in the quartz tubes, which were further put into furnaces. For example, the results of the implementation are as follows: SbCl<sub>3</sub> (0.878 g) and Sb<sub>2</sub>O<sub>3</sub> (1.122 g) for SbOCl, SbCl<sub>3</sub> (1.516 g) and Sb<sub>2</sub>O<sub>3</sub> (0.484 g) for Sb<sub>2</sub>OCl<sub>4</sub>, and SbCl<sub>3</sub> (0.249 g) and Sb<sub>2</sub>O<sub>3</sub> (1.751 g) for Sb<sub>8</sub>O<sub>11</sub>Cl<sub>2</sub>. Then, the mixtures were heated to 170 °C for SbOCl, 150 °C for Sb<sub>2</sub>OCl<sub>4</sub>, 306 °C for Sb<sub>3</sub>O<sub>4</sub>I, 420 °C for Sb<sub>8</sub>O<sub>11</sub>Cl<sub>2</sub>, and 500 °C for Sb<sub>8</sub>O<sub>11</sub>Br<sub>2</sub> and finally held for 72 h with several intermittent grindings. Finally, we obtained target product yields of 98.2% for SbOCl(1.964 g), 97.6% for Sb<sub>2</sub>OCl<sub>4</sub>(1.952 g), and 96.7% for Sb<sub>8</sub>O<sub>11</sub>Cl<sub>2</sub>(1.933 g), respectively. Since it is a solid-phase reaction in which all atoms are involved, the yield is close to 100% theoretically. However, it is also related to the purity of the sample, losses during vacuuming, and sampling in practice. Their chemical reaction equations were as follows:

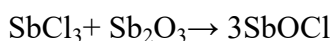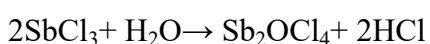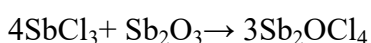

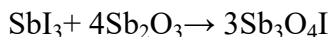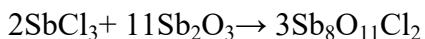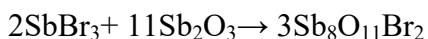

## Characterization

Single crystals with good crystalline quality and suitable sizes of  $\text{SbOCl}$ , and  $\text{Sb}_2\text{OCl}_4$ , were selected for structure determination. The data were collected on a Bruker D8 Venture with  $\text{Mo K}\alpha$  radiation at room temperature. Absorption correction was performed with the Numerical Mu Calculated program. Integration and absorption corrections of the data were completed in SAINT and SCALE programs,<sup>1</sup> respectively. The structures were solved by direct methods and then refined by full-matrix least squares on  $F^2$  with the SHELXTL-14 program,<sup>2</sup> and all atoms were refined anisotropically. PLATON was used to confirm whether higher.<sup>3</sup>

Powder X-ray diffraction (PXRD) data were collected by putting the powder sample onto the flat sample holders utilizing a Bruker D2 PHASER X-ray diffractometer equipped with  $\text{Mo K}\alpha$  radiation, and the diffraction patterns were taken in the  $2\theta$  range from 5 or 10 to  $70^\circ$ .

The infrared (IR) absorption spectra were recorded on a SHIMADZU IRAffinity-1 Fourier transform infrared spectrometer in the range of  $400\text{--}4000\text{ cm}^{-1}$ . The spectral resolution is about  $2\text{ cm}^{-1}$ . The samples were pressed into discs (10 mg of the sample and 1000 mg of KBr). The UV-vis-NIR diffuse-reflectance spectra were recorded using a Solid Spec-3700DUV spectrophotometer. The measurements were performed in the spectral range from 200 to 2600 nm with a scan step width of 1 nm at room temperature and in a nitrogen atmosphere.

**Thermal Stability Measurement.** About 10 mg of  $\text{SbOCl}$ ,  $\text{Sb}_2\text{OCl}_4$ ,  $\text{Sb}_3\text{O}_4\text{I}$ ,  $\text{Sb}_8\text{O}_{11}\text{Cl}_2$ , and  $\text{Sb}_8\text{O}_{11}\text{Br}_2$  were used for the differential scanning calorimetry (DSC) and thermogravimetric (TG) analysis. These measurements are carried out by the NETZSCH STA-2500 thermal analyzer. The measured temperature range is from room temperature to  $500\text{ }^\circ\text{C}$  with a rate of  $20\text{ }^\circ\text{C}/\text{min}$ .

Energy dispersive X-ray spectroscopy. Elemental analysis of  $\text{Sb}_2\text{OCl}_4$  was carried

out on the surface of a clean single crystal with the aid of a field emission scanning electron microscope (SEM, SUPRA 55 VP) equipped with an energy dispersive X-ray spectroscope (EDS, BRUKER X-flash-sdd-5010).

The refractive index difference of the compound was measured through a polarizing microscope (ZEISS Axio Scope. 5 pol) equipped with a Berek compensator under the light source with an average wavelength of 546 nm. The interference color in the measurement was rated as first, second, and higher-order to ensure the accuracy of measurement as their boundary lines were relatively clear compared to subsequent interference color. The crystals with high optical quality were selected to scan under the polarizing microscope. The theory on which the measurement is based can be expressed as the following formula:

$$R = |N_g - N_p| \times T = \Delta n \times T \quad (1)$$

$R$ ,  $N_g$ ,  $N_p$ ,  $T$ , and  $\Delta n$  refer to optical path difference, refractive index of fast light, refractive index of slow light, thickness of crystal, and birefringence, respectively.

## Theoretical calculations

The first-principles calculations were performed to explore the relationship between electronic structure and optical properties for the experimental compounds via using the plane-wave pseudopotential methods based on density functional theory (DFT) implemented in the CASTEP code.<sup>4,5</sup> The generalized gradient approximation (GGA) with Perdew–Burke–Ernzerhof (PBE) functional was adopted to describe the exchange–correlation energy. To achieve the convergence of calculation results, the plane-wave energy cutoff was set as 750 eV under norm-conserving pseudopotential (NCP), and the Monkhorst-Pack scheme was given by  $3 \times 2 \times 3$ ,  $3 \times 2 \times 4$ ,  $4 \times 5 \times 1$ ,  $3 \times 9 \times 2$ ,  $2 \times 3 \times 2$ ,  $3 \times 2 \times 2$ , and  $3 \times 2 \times 2$  for  $\text{SbOCl}$ ,  $\text{Sb}_2\text{OCl}_4$ ,  $\text{Sb}_3\text{O}_4\text{F}$ ,  $\text{Sb}_3\text{O}_4\text{I}$ ,  $\text{Sb}_3\text{O}_4\text{Cl}$ ,  $\text{Sb}_8\text{O}_{11}\text{Cl}_2$ , and  $\text{Sb}_8\text{O}_{11}\text{Br}_2$ , respectively in the irreducible Brillouin zone. Other calculation parameters and convergent criteria were set by the default values of the CASTEP code. The linear optical properties are obtained based on the dielectric function:  $\varepsilon(\omega) = \varepsilon_1(\omega) + i\varepsilon_2(\omega)$ , where  $\varepsilon_1(\omega)$  and  $\varepsilon_2(\omega)$  are the real and imaginary parts of the dielectric function, respectively. The imaginary part of the dielectric function  $\varepsilon_2$  can be calculated

based on the electronic structures and the real part is obtained by the Kramers-Kronig transformation, accordingly, the refractive indices and the birefringence ( $\Delta n$ ) can be calculated. The crystal orbital Hamilton Population (COHP) was calculated by the LOBSTER code.<sup>6</sup>

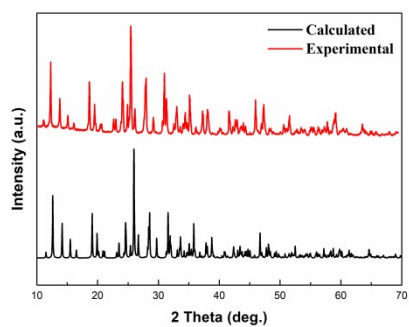

(a)

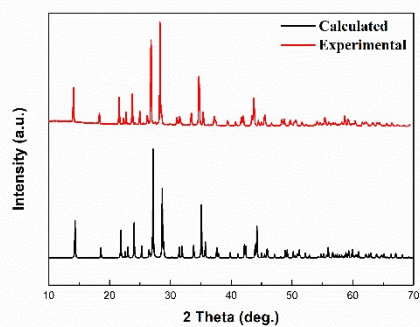

(b)

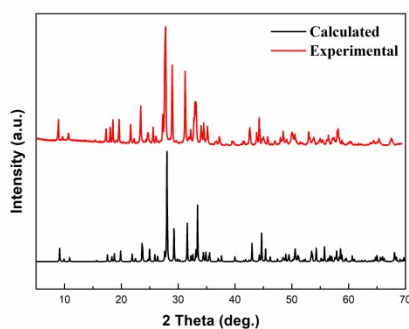

(c)

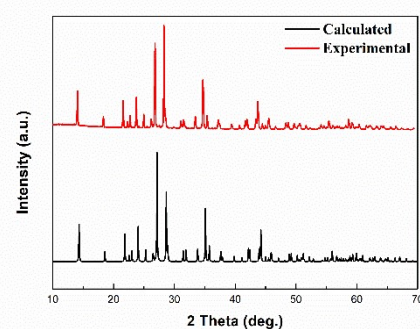

(d)

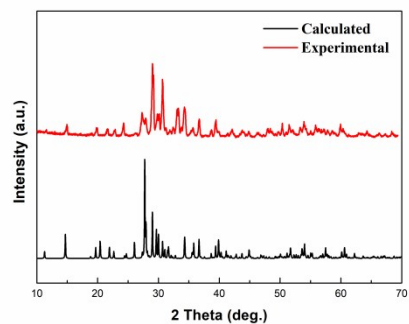

(e)

**Figure S1.** Experimental and calculated XRD patterns of (a)  $\text{SbOCl}$ , (b)  $\text{Sb}_2\text{OCl}_4$ , (c)  $\text{Sb}_8\text{O}_{11}\text{Cl}_2$ , (d)  $\text{Sb}_8\text{O}_{11}\text{Br}_2$ , and (e)  $\text{Sb}_3\text{O}_4\text{I}$ .

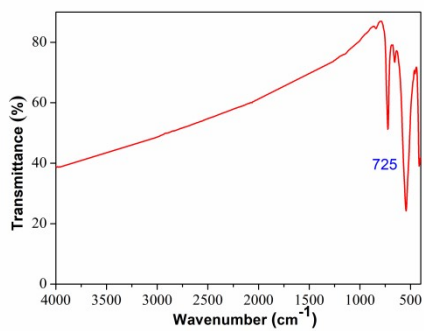

(a)

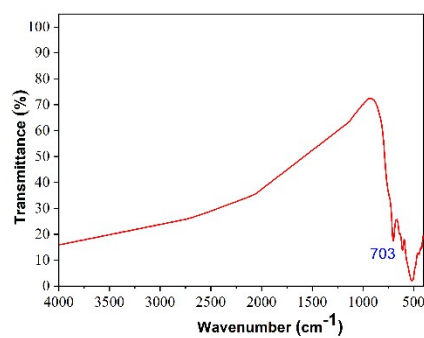

(b)

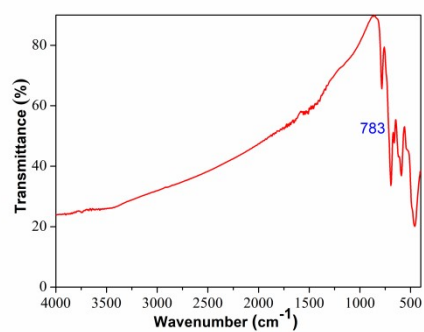

(c)

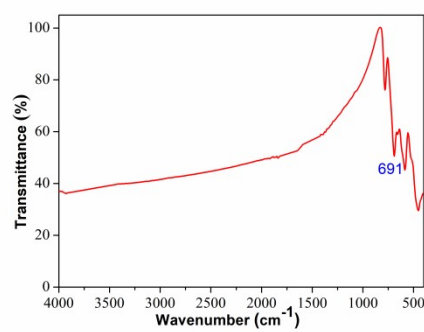

(d)

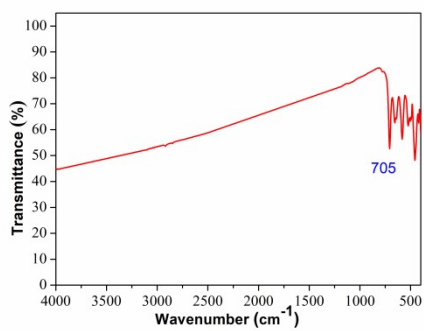

(e)

**Figure S2.** IR spectra of (a) SbOCl, (b) Sb<sub>2</sub>OCl<sub>4</sub>, (c) Sb<sub>8</sub>O<sub>11</sub>Cl<sub>2</sub>, (d) Sb<sub>8</sub>O<sub>11</sub>Br<sub>2</sub>, and (e) Sb<sub>3</sub>O<sub>4</sub>I.

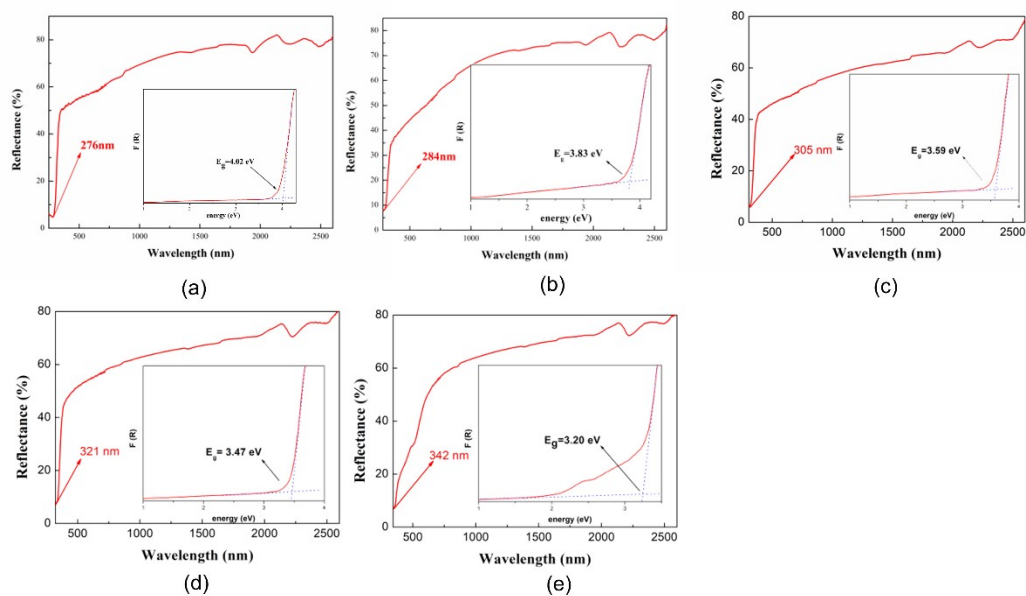

**Figure S3.** UV-vis-NIR diffuses reflectance spectra and experimental band gap of (a) SbOCl, (b) Sb<sub>2</sub>OCl<sub>4</sub>, (c) Sb<sub>8</sub>O<sub>11</sub>Cl<sub>2</sub>, (d) Sb<sub>8</sub>O<sub>11</sub>Br<sub>2</sub>, and (e) Sb<sub>3</sub>O<sub>4</sub>I.



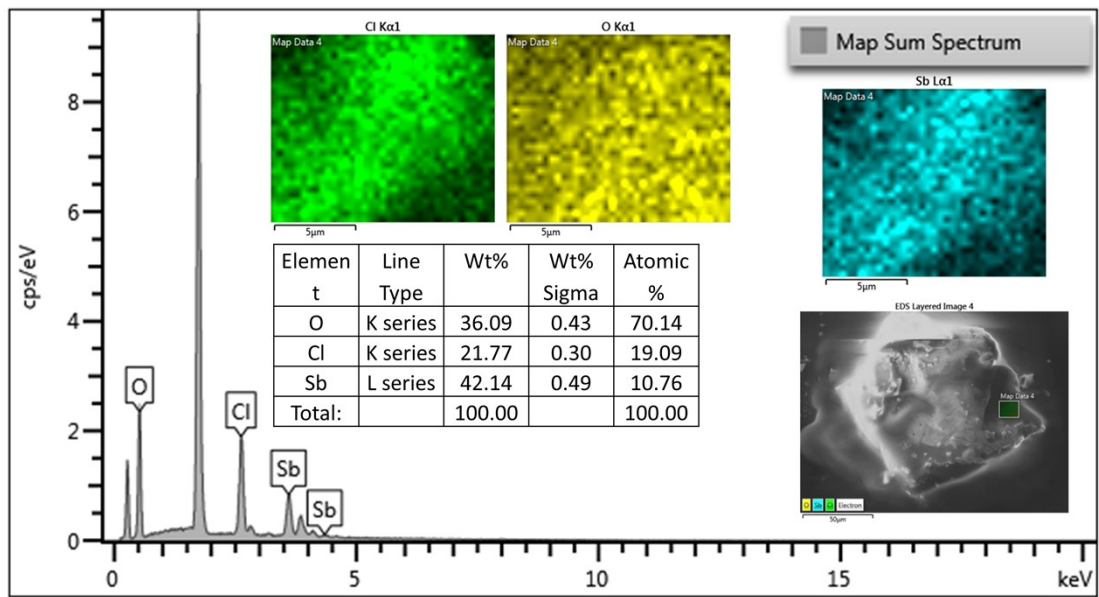

Figure S4. EDS analysis of  $Sb_2OCl_4$ .

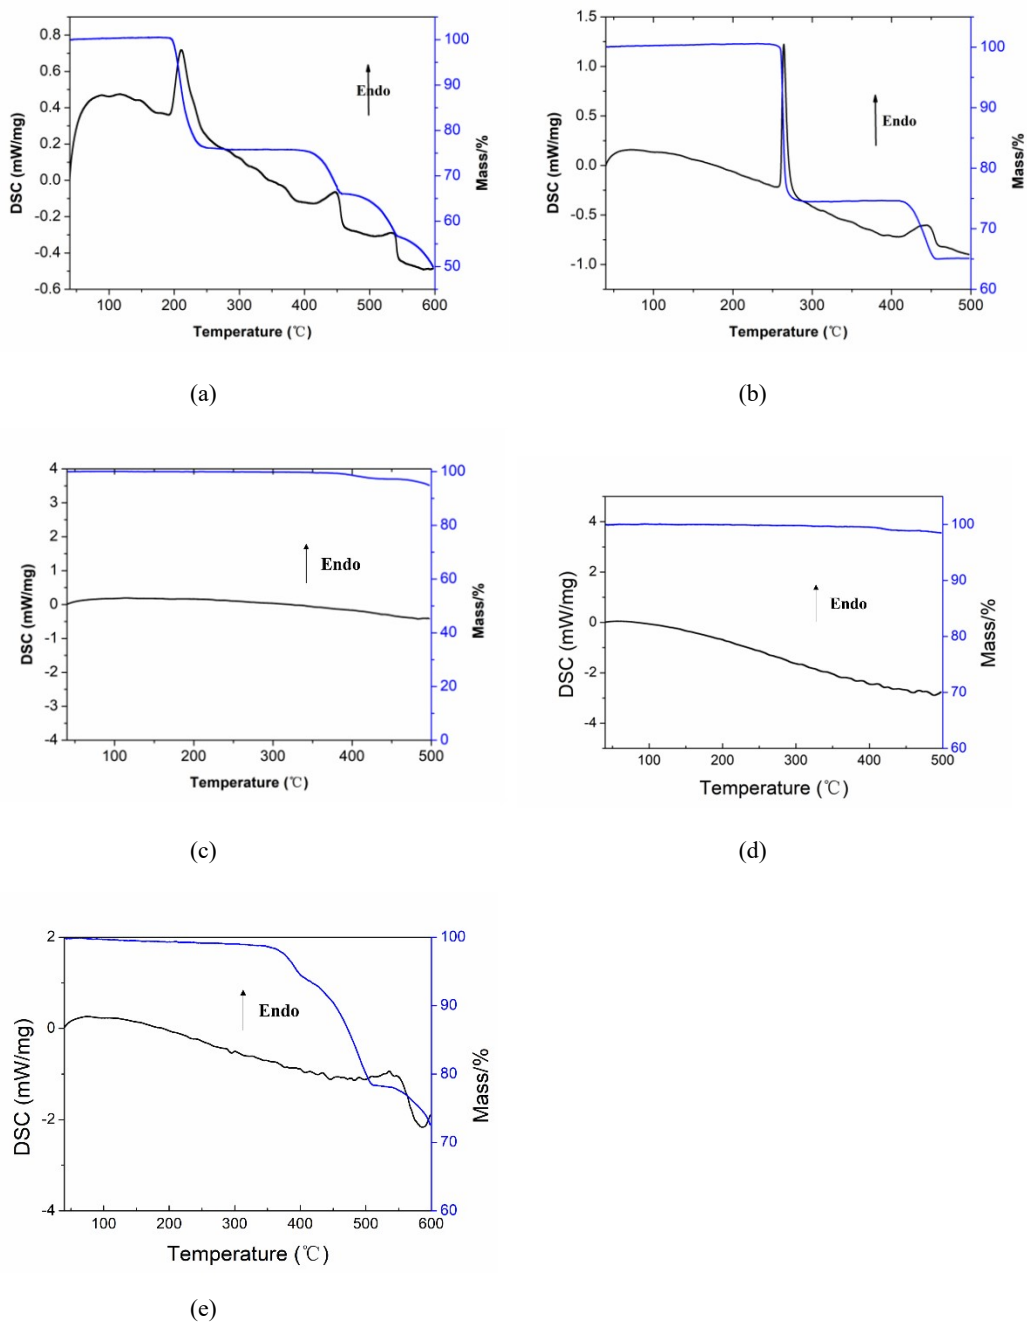

**Figure S5.** TG and DSC curves for (a)  $\text{SbOCl}$ , (b)  $\text{Sb}_2\text{OCl}_4$ , (c)  $\text{Sb}_8\text{O}_{11}\text{Cl}_2$ , (d)  $\text{Sb}_8\text{O}_{11}\text{Br}_2$  and (e)  $\text{Sb}_3\text{O}_4\text{I}$ .

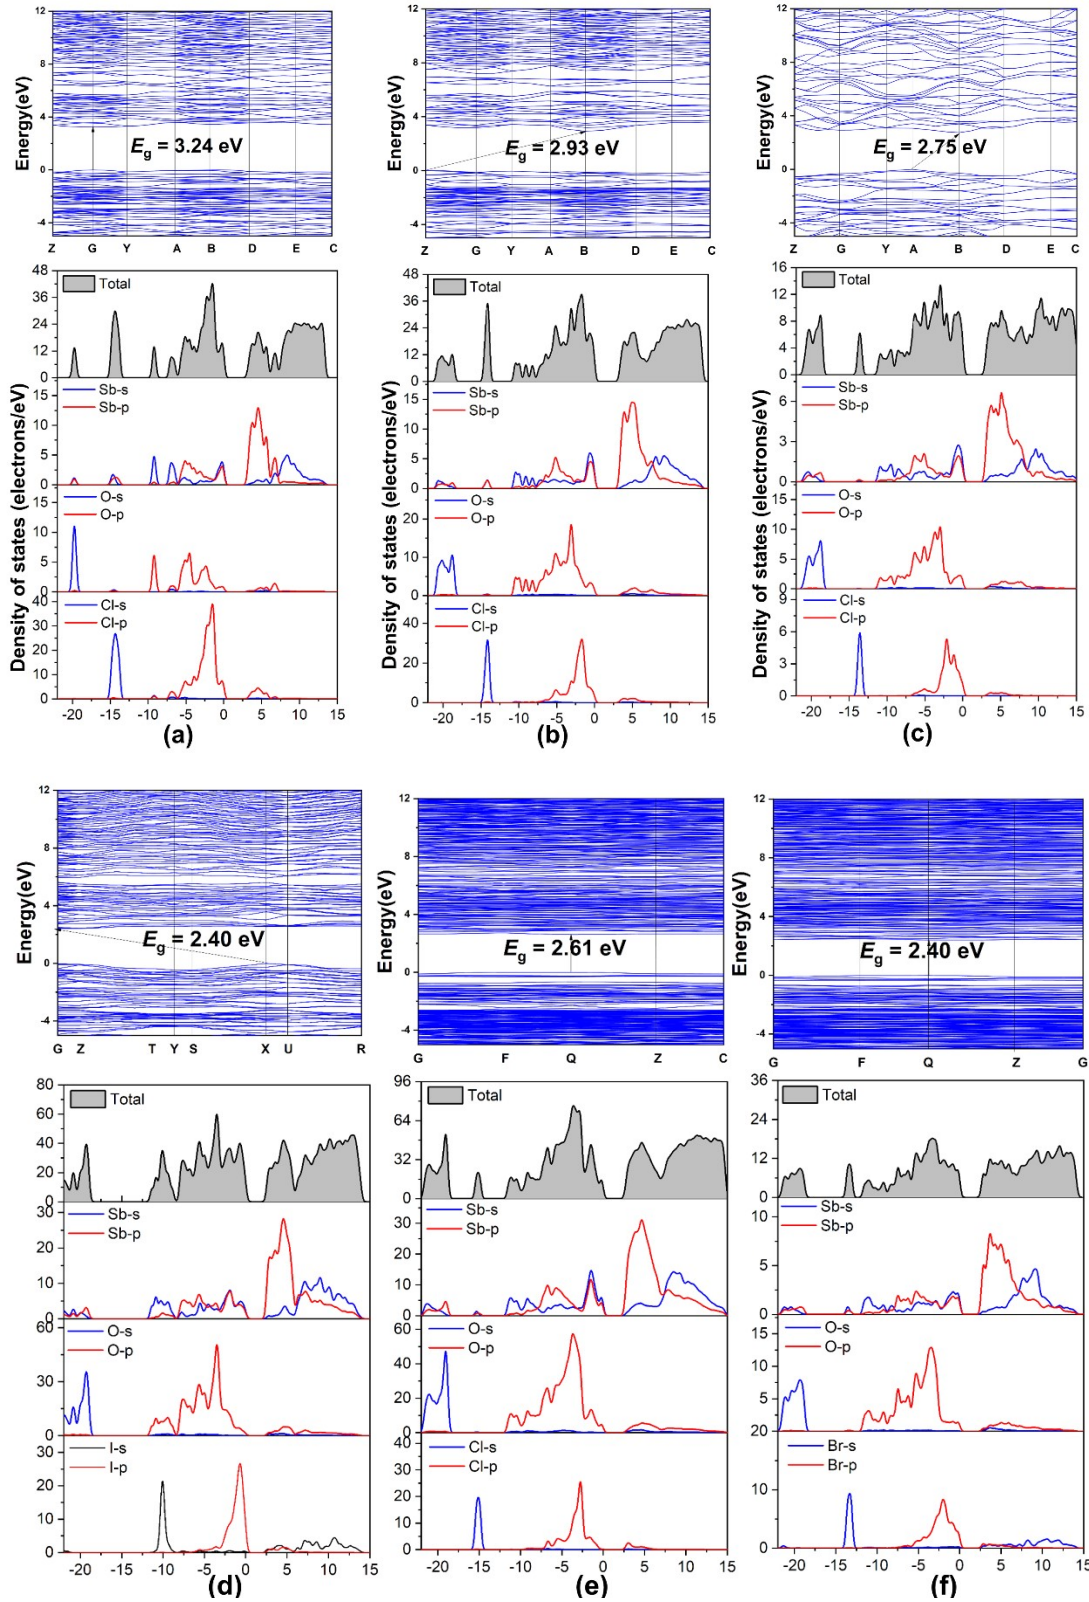

**Figure S6.** Electronic structures and partial density of states of (a) SbOCl, (b) Sb<sub>2</sub>OCl<sub>4</sub>, (c) Sb<sub>3</sub>O<sub>4</sub>Cl, (d) Sb<sub>3</sub>O<sub>4</sub>I, (e) Sb<sub>8</sub>O<sub>11</sub>Cl<sub>2</sub>, and (f) Sb<sub>8</sub>O<sub>11</sub>Br<sub>2</sub>.

**Table S1.** Crystal data and structure refinements for SbOCl, and Sb<sub>2</sub>OCl<sub>4</sub>.

| Empirical formula                                                                             | SbOCl                           | Sb <sub>2</sub> OCl <sub>4</sub> |
|-----------------------------------------------------------------------------------------------|---------------------------------|----------------------------------|
| Temperature                                                                                   | 298(2) K                        | 298(2) K                         |
| Wavelength                                                                                    | 0.71073 Å                       | 0.71073 Å                        |
| Crystal system                                                                                | monoclinic                      | monoclinic                       |
| Space group                                                                                   | <i>P2<sub>1</sub>/c</i>         | <i>P2<sub>1</sub>/c</i>          |
| Formula weight                                                                                | 173.20                          | 401.30                           |
| <i>a</i> (Å)                                                                                  | 7.908(9)                        | 10.028(3)                        |
| <i>b</i> (Å)                                                                                  | 10.732(14)                      | 10.203(3)                        |
| <i>c</i> (Å)                                                                                  | 9.527(10)                       | 7.593(2)                         |
| $\alpha$ (°)                                                                                  | 90                              | 90                               |
| $\beta$ (°)                                                                                   | 103.65(3)                       | 110.267(11)                      |
| $\gamma$ (°)                                                                                  | 90                              | 90                               |
| Z, Volume (Å <sup>3</sup> )                                                                   | 12, 785.8(16)                   | 4, 728.8(4)                      |
| $\rho_{\text{Calcd}}$ (mg/m <sup>3</sup> )                                                    | 4.392                           | 3.657                            |
| $\mu$ (mm)                                                                                    | 11.195                          | 8.773                            |
| <i>F</i> (000)                                                                                | 912.0                           | 712.0                            |
| <i>R</i> (int)                                                                                | 0.0927                          | 0.1375                           |
| Goodness-of-fit on <i>F</i> <sup>2</sup>                                                      | 1.012                           | 0.978                            |
| Final <i>R</i> indices                                                                        | <i>R</i> <sub>1</sub> = 0.0423, | <i>R</i> <sub>1</sub> = 0.0497,  |
| [ <i>F</i> <sub>o</sub> <sup>2</sup> > 2σ( <i>F</i> <sub>o</sub> <sup>2</sup> )] <sup>a</sup> | <i>wR</i> <sub>2</sub> = 0.1041 | <i>wR</i> <sub>2</sub> = 0.0946  |
| <i>R</i> indices (all data) <sup>a</sup>                                                      | <i>R</i> <sub>1</sub> = 0.0541, | <i>R</i> <sub>1</sub> = 0.1113,  |
|                                                                                               | <i>wR</i> <sub>2</sub> = 0.1114 | <i>wR</i> <sub>2</sub> = 0.1133  |
| Largest diff. peak and hole (e·Å <sup>-3</sup> )                                              | 2.633/-2.104                    | 1.540/-1.073                     |

<sup>[a]</sup>  $R_1 = \sum ||F_o| - |F_c|| / \sum |F_o|$  and  $wR_2 = [\sum w(F_o^2 - F_c^2)^2 / \sum wF_o^4]^{1/2}$  for  $F_o^2 > 2\sigma(F_o^2)$ .

**Table S2a.** Fractional atomic coordinates ( $\times 10^4$ ) and equivalent isotropic displacement parameters ( $\text{\AA}^2 \times 10^3$ ) forSbOCl.  $U_{\text{eq}}$  is defined as 1/3 of the trace of the orthogonalised  $U_{ij}$  tensor.

| <b>Atom</b> | <b>x</b> | <b>y</b> | <b>z</b> | <b>U(eq)</b> | <b>BVS</b> |
|-------------|----------|----------|----------|--------------|------------|
| Sb(1)       | 2184(1)  | 5230(1)  | 5750(1)  | 20(1)        | 2.93       |
| Sb(2)       | 4169(1)  | 7569(1)  | 4098(1)  | 22(1)        | 2.92       |
| Sb(3)       | -190(1)  | 8282(1)  | 2693(1)  | 23(1)        | 2.80       |
| Cl(1)       | 6053(3)  | 6083(2)  | 6552(2)  | 28(1)        | 0.95       |
| Cl(2)       | 3863(4)  | 9024(2)  | 5890(3)  | 40(1)        | 0.93       |
| Cl(3)       | -910(3)  | 6432(2)  | 1311(3)  | 35(1)        | /          |
| O(1)        | 2204(7)  | 6616(5)  | 4434(6)  | 21(1)        | 2.14       |
| O(2)        | 2306(7)  | 8419(5)  | 2599(6)  | 20(1)        | 2.28       |
| O(3)        | -281(7)  | 9315(5)  | 936(6)   | 20(1)        | 2.34       |

**Table S2b.** Fractional atomic coordinates ( $\times 10^4$ ) and equivalent isotropic displacement parameters ( $\text{\AA}^2 \times 10^3$ ) for

$\text{Sb}_2\text{OCl}_4$ .  $U_{\text{eq}}$  is defined as 1/3 of the trace of the orthogonalised  $U_{ij}$  tensor.

| <b>Atom</b> | <b>x</b> | <b>y</b> | <b>z</b> | <b>U(eq)</b> | <b>BVS</b> |
|-------------|----------|----------|----------|--------------|------------|
| Sb(1)       | 5046(1)  | 5681(1)  | 2963(1)  | 34(1)        | 2.83       |
| Sb(2)       | 1573(1)  | 5652(1)  | 3466(1)  | 38(1)        | 2.83       |
| Cl(1)       | 5770(3)  | 7748(2)  | 4398(4)  | 40(1)        | 0.95       |
| Cl(2)       | 2662(3)  | 6734(3)  | 780(4)   | 52(1)        | 0.74       |
| Cl(3)       | 1067(4)  | 3681(3)  | 1767(5)  | 58(1)        | 1.00       |
| Cl(4)       | 1731(3)  | 4639(3)  | 6463(4)  | 50(1)        | 0.75       |
| O(1)        | 3717(7)  | 5288(6)  | 4405(9)  | 35(2)        | 2.21       |

**Table S3a.** The selected bond lengths for SbOCl.

| Atom         | Length/Å |
|--------------|----------|
| Sb(1)-O(1)   | 1.947(6) |
| Sb(1)-O(2)#1 | 2.265(6) |
| Sb(1)-O(3)#1 | 2.058(6) |
| Sb(1)-O(3)#2 | 2.161(6) |
| Sb(2)-O(1)   | 1.949(6) |
| Sb(2)-O(2)   | 2.013(6) |
| Sb(2)-Cl(2)  | 2.368(3) |
| Sb(3)-O(2)   | 2.002(6) |
| Sb(3)-O(3)   | 1.994(6) |
| Sb(3)-Cl(3)  | 2.377(3) |

Symmetry transformations used to generate equivalent atoms:

#1  $x, -y+3/2, z+1/2$  #2  $-x, y-1/2, -z+1/2$  #3  $x, -y+3/2, z-1/2$   
#4  $-x, y+1/2, -z+1/2$

**Table S3b.** The selected bond lengths for Sb<sub>2</sub>OCl<sub>4</sub>.

| <b>Atom</b>  | <b>Length/Å</b> |
|--------------|-----------------|
| Sb(1)-Cl(1)  | 2.369(3)        |
| Sb(1)-Cl(2)  | 2.621(3)        |
| Sb(1)-O(1)   | 2.036(6)        |
| Sb(1)-O(1)#1 | 2.189(7)        |
| Sb(2)-Cl(2)  | 2.849(3)        |
| Sb(2)-Cl(3)  | 2.348(3)        |
| Sb(2)-Cl(4)  | 2.454(3)        |
| Sb(2)-O(1)   | 2.051(7)        |

Symmetry transformations used to generate equivalent atoms:

#1 -x+1,-y+1,-z+1



**Table S4a.** The selected bond angles for SbOCl.

| Atom                | Angle/°   |
|---------------------|-----------|
| O(3)#1-Sb(1)-O(2)#1 | 69.4(2)   |
| O(3)#2-Sb(1)-O(2)#1 | 139.8(2)  |
| O(3)#1-Sb(1)-O(3)#2 | 70.4(3)   |
| O(1)-Sb(1)-O(2)#1   | 90.4(2)   |
| O(1)-Sb(1)-O(3)#2   | 88.8(2)   |
| O(1)-Sb(1)-O(3)#1   | 91.5(2)   |
| O(2)-Sb(2)-Cl(2)    | 91.7(2)   |
| O(1)-Sb(2)-Cl(2)    | 90.4(2)   |
| O(1)-Sb(2)-O(2)     | 82.9(2)   |
| O(2)-Sb(3)-Cl(3)    | 98.43(18) |
| O(3)-Sb(3)-Cl(3)    | 92.47(19) |
| O(3)-Sb(3)-O(2)     | 76.2(2)   |

Symmetry transformations used to generate equivalent atoms:

#1  $x, -y+3/2, z+1/2$  #2  $-x, y-1/2, -z+1/2$  #3  $x, -y+3/2, z-1/2$

#4  $-x, y+1/2, -z+1/2$

**Table S4b.** The selected bond angles for Sb<sub>2</sub>OCl<sub>4</sub>.

| Atom               | Angle/°    |
|--------------------|------------|
| Cl(1)-Sb(1)-Cl(2)  | 89.63(10)  |
| O(1)-Sb(1)-Cl(1)   | 94.70(19)  |
| O(1)#1-Sb(1)-Cl(1) | 89.75(18)  |
| O(1)-Sb(1)-Cl(2)   | 78.3(2)    |
| O(1)#1-Sb(1)-Cl(2) | 150.10(18) |
| O(1)-Sb(1)-O(1)#1  | 71.9(3)    |
| Cl(3)-Sb(2)-Cl(2)  | 90.12(11)  |
| Cl(3)-Sb(2)-Cl(4)  | 94.63(11)  |
| Cl(4)-Sb(2)-Cl(2)  | 155.43(10) |
| O(1)-Sb(2)-Cl(2)   | 72.75(19)  |
| O(1)-Sb(2)-Cl(3)   | 92.1(2)    |
| O(1)-Sb(2)-Cl(4)   | 82.98(18)  |

Symmetry transformations used to generate equivalent atoms:

#1 -x+1,-y+1,-z+1

## REFERENCES

1. SAINT, *Version 7.60A*, Bruker Analytical X-ray Instruments, Inc., Madison, WI, 2008.
2. Sheldrick, G. M. *SHELXTL, version 6.12*; Bruker Analytical X-ray Instruments, Inc.: Madison, WI, 2001.
3. A. L. Spek, *J. Appl. Crystallogr.* 2003, **36**, 7.
4. S. J. Clark, M. D. Segall, C. J. Pickard, P. J. Hasnip, M. I. Probert, K. Refson, M. C. Payne, Z. Kristallogr. *Cryst. Mater.*, 2005, **220**, 567.
5. (a) A. M. Rappe, K. M. Rabe, E. Kaxiras, J. D. Joannopoulos, *Phys. Rev. B*, 1990, **41**, 1227; (b) J. S. Lin, A. Qteish, M. C. Payne, V. Heine, *Phys. Rev. B*, 1993, **47**, 4174; (c) M. H. Lee, PhD. Thesis, The University of Cambridge 1996.
6. Maintz, S.; Deringer, V. L.; Tchougréeff, A. L.; Dronskowski, R. LOBSTER: A Tool to Extract Chemical Bonding from Plane-Wave Based DFT. *J. Comput. Chem.* 2016, **37**, 1030–1035.
